# Supplementary material for: Determination of Major Endogenous FAHFAs in Healthy Human Circulation: The Correlations with Several Circulating Cardiovascular-Related Biomarkers and Anti-Inflammatory Effects on RAW 264.7 Cells
Source: Biomolecules. 2020 Dec 17;10(12):1689. doi: 10.3390/biom10121689 (PMC7766943; doi:10.3390/biom10121689)
Supplement: Supplementary file 1 [file biomolecules-10-01689-s001.pdf]

**Figure Supplementary 1.** The correlation of FAHFAs with their fatty acids precursors.

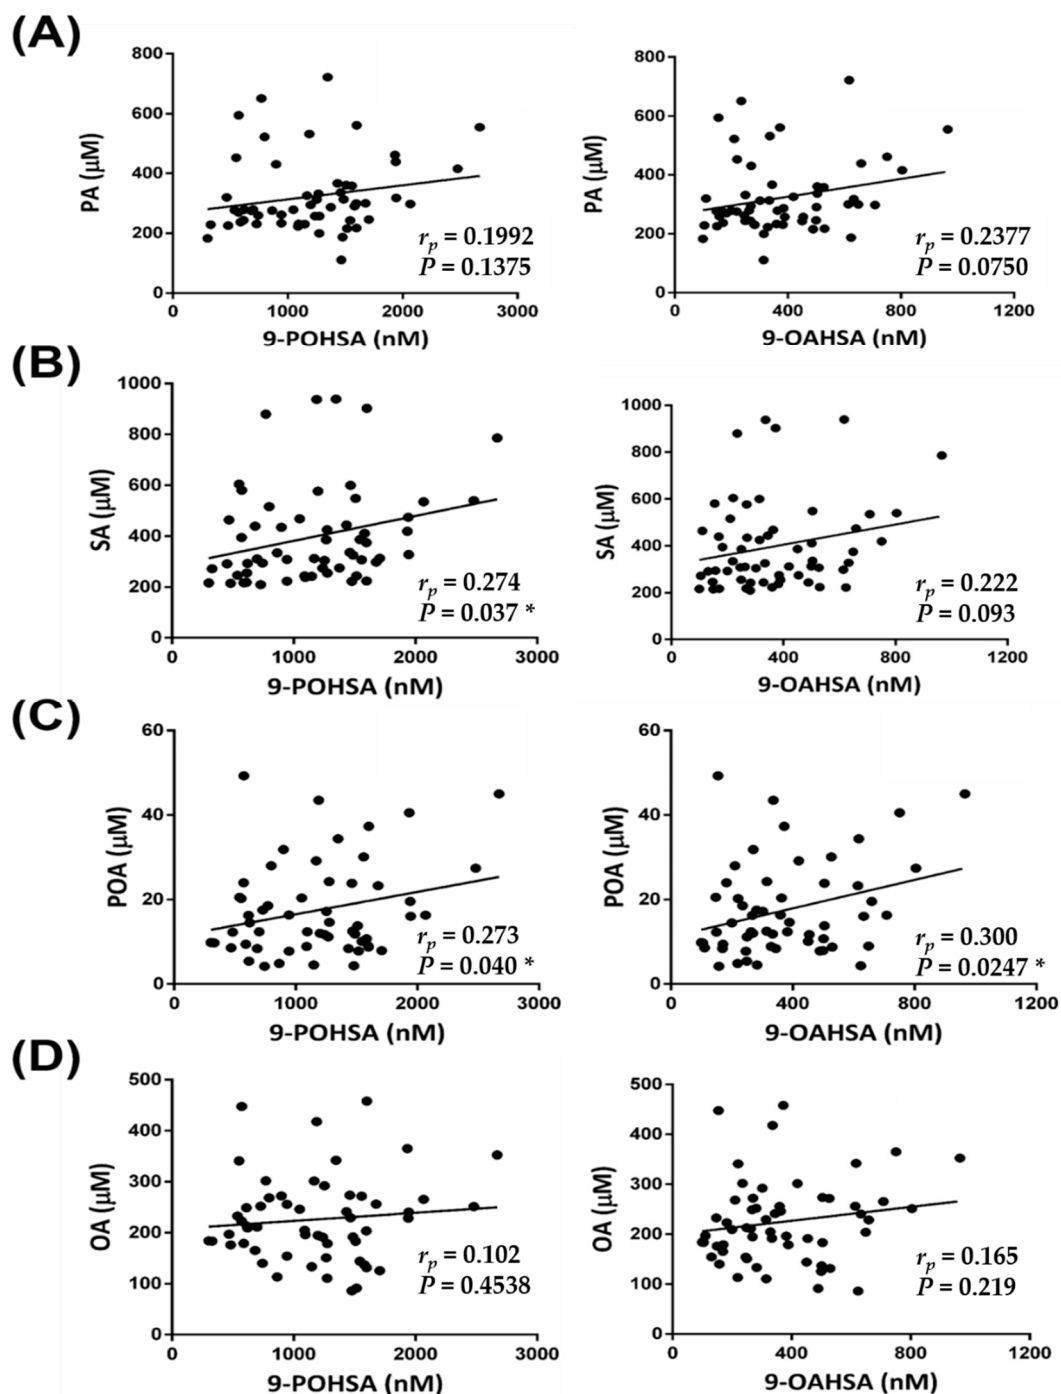

**Figure S1.** The correlation of FAHFAs with their fatty acids precursors. The correlation between PA, SA, POA, and OA with 9-POHSA and 9-OAHSA were shown in (A), (B), (C), and (D), respectively. POA level had a positive correlation with 9-POHSA and 9-OAHSA.  $r_p$ : Pearson correlation coefficient. Data are presented as mean  $\pm$  SD (\*  $p < 0.05$ ).
